# Supplementary material for: Differential Expression of Genes and DNA Methylation associated with Prenatal Protein Undernutrition by Albumen Removal in an avian model
Source: PubMed Central journal article supplement (PMC4748411; doi:10.1038/srep20837), 2016-02-10
Supplement: srep20837-s1.pdf [file srep20837-s1.pdf]

## Differential Expression of Genes and DNA Methylation associated with Prenatal Protein Undernutrition by Albumen Removal in an avian model

Els Willems<sup>1,2</sup>, Carlos Guerrero-Bosagna<sup>2</sup>, Eddy Decuypere<sup>1</sup>, Steven Janssens<sup>3</sup>, Johan Buyse<sup>1</sup>, Nadine Buys<sup>3</sup>, Per Jensen<sup>2</sup>, Nadia Everaert<sup>1,4</sup>

Supplementary Table S1: **List of primers used for quantification of the gene expression via qPCR.** The selected genes had a differential expression in the RNA-Seq results where expression in the liver of the albumen-deprived hens differed from the sham-manipulated group (14 genes) or in addition from the non-manipulated group (1 gene). ACTB and PPID were reference genes used for normalization.

| Gene      | Accession number (Ensembl) | Forward 5'-primer-3'     | Reverse 5'-primer-3'      | Size (bp) |
|-----------|----------------------------|--------------------------|---------------------------|-----------|
| BMF       | ENSGALG00000014537         | CTCCACATACAGCGGCATCA     | AGCTGCCACCACACTTGATT      | 50        |
| CKS1B     | ENSGALG00000028664         | CCAAAGACATCGCCAAGCTG     | GGAGGATGTGTGGCTCTGG       | 129       |
| GJA1      | ENSGALG00000014873         | CAGCAGCGCCAATATCCAGT     | AAGAGGACAGACAGCCACAC      | 113       |
| GLUL      | ENSGALG00000003678         | TATGGTGTCCAACCAGCACC     | GCAGTAGTACGGACCTTGGG      | 124       |
| H2B-I     | ENSGALG00000027174         | AACGACATCTTCGAGCGCAT     | TGTACTTGGTGACCGCCTTG      | 166       |
| HERPUD1   | ENSGALG00000001220         | CTGGACCATCAGCTCCTGC      | TGAGCAGCTTTAACCTCCGT      | 122       |
| LAPTM4B   | ENSGALG00000028628         | CGCGTATAAGCAACATGCGG     | CTGGCGAAGGTAGTCCTGAA      | 130       |
| LECT2     | ENSGALG00000006323         | TGCTCCCTTTTCTGGTGAGC     | GACACAGAAGCCTGATCCCC      | 100       |
| LRRC3C    | ENSGALG00000026789         | CGCCATGGTGATCTCCTACC     | GGGCAGCGATTTGAGGTACT      | 88        |
| NXPH2     | ENSGALG00000029083         | GCGTCCTCCGGATCGTATTT     | ACAGGCGTAGTGGGTTGATG      | 138       |
| SEMA6D    | ENSGALG00000004844         | AGGCAAGGCTGTGTATTCCC     | AGAACGAATCCCCAGGAACG      | 134       |
| SLC6A6    | ENSGALG00000006425         | TCTGGGAGCGCAATGTACTG     | ACAGTGCCAGATCCCCTTG       | 75        |
| SPAG4like | ENSGALG00000000443         | CGCAGACCTTCTTGCTAAAGAATA | CACTCGGTAAAGGCAGGTGT      | 107       |
| TMEM86A   | ENSGALG00000006358         | GGCTACTTCATTCATGGTCTGC   | TCATGCCAAAGGCTGAGGAG      | 70        |
| TNFSF10   | ENSGALG00000009179         | GAAGTGGCACCTGGGAAAGT     | CCTGTACCGTTGATTGCAG       | 82        |
| ACTB      | ENSGALG00000009621         | TCGCCCCAGACATCAGGGTGTGA  | TTGCTCTGGGCTTCATCACCAACGT | 75        |
| PPID      | ENSGALG00000009451         | GTCGCACCCGTCCCCTGTAGA    | ATTCGTCCAACCTCGCTCTCCCC   | 93        |

For every gene the Ensembl accession number, the sequences of the forward (F) and reverse primer (R) and the size of the amplified fragment (bp) are provided.

Supplementary Table S2: **List of primers used for quantification of the DNA methylation of the genes of interest.** Genes were selected based on differential expression both in RNA-Seq and qPCR (9 genes). In addition, 3 key central genes of pathways affected by albumen removal were also included.

| Gene    | Accession number   | Primer pair | Forward 5'-primer-3'  | Reverse 5'-primer-3'  | Ta (°C) | Primer conc. (μM) | Size (bp) | # CpG |
|---------|--------------------|-------------|-----------------------|-----------------------|---------|-------------------|-----------|-------|
| BMF     | ENSGALG00000014537 | BMF_1       | GCACGGAGGAATCCCATTGA  | CCTACAGCTCGCTCCAGTTC  | 58      | 0.75              | 150       | 19    |
| CKS1B   | ENSGALG00000028664 | CKS1B_1     | TGTGATGCTGCCAAAGACA   | GGGACGTAGCACAGTGTGAG  | 60      | 0.5               | 199       | 10    |
| H2B-I   | ENSGALG00000027174 | H2B_1       | CCCCTTCGGCGTCTTACAG   | CCGTTTGGTATTGAGCCCCT  | 55      | 0.75              | 197       | 24    |
|         |                    | H2B_2       | TCCAACCAACAAACCAACCG  | TGGAAGTTCGTGTTTGTGGC  | 58      | 0.75              | 199       | 28    |
|         |                    | H2B_3       | CAAGAAGAGCCGCAAGGAGA  | ATGGTTCGAGCGCTTGTGTA  | 60      | 0.5               | 180       | 19    |
| LAPTM4B | ENSGALG00000028628 | LAPTM4B_1   | GTCTGGTACCTGGTAAGCGG  | GCGTTAAAGGGAGCAGCAAG  | 60      | 0.5               | 184       | 17    |
|         |                    | LAPTM4B_2   | GGATTCTTCGGTCTCGTGGG  | GAGCAGAGGATCAGCACCAG  | 60      | 0.5               | 161       | 13    |
|         |                    | LAPTM4B_3   | TGAGCTCCTGTGCTTCCCTG  | GCTCGGGGTGAAGATGTGAA  | 60      | 1                 | 185       | 11    |
| LRRC3C  | ENSGALG00000026789 | LRRC3C_1    | GCTCAACCCTCGGCTTACTT  | TGCCGTAACCTCGGTGCAG   | 60      | 0.5               | 198       | 22    |
|         |                    | LRRC3C_2    | CGAGGTCCCCAAAGACATCC  | GGAGGACAGGTCCAGGGAG   | 60      | 0.5               | 199       | 18    |
|         |                    | LRRC3C_3    | GACGTCCTCAGCAACGTGAA  | ACGTTGCAGAAGTCCGTGTC  | 60      | 0.5               | 200       | 19    |
| NXPH2   | ENSGALG00000029083 | NXPH2_1     | AAATCGCGTCTGTGGGATG   | TTCGACACGACGTTACACCT  | 60      | 0.5               | 191       | 25    |
|         |                    | NXPH2_2     | AGGTGTAACGTCGTGTCGAA  | CCTTCTCACGCCGTAAGGTT  | 60      | 0.5               | 196       | 13    |
|         |                    | NXPH2_3     | TGGGTTTCGTTTCAAGGGGAG | GCCGCTACGAGTTTTACCA   | 60      | 0.5               | 191       | 23    |
| SEMA6D  | ENSGALG00000004844 | SEMA6D_1    | GTGCCAGTGCTCAAATGCAA  | ATTAGCATCACAGAGGCGCA  | 60      | 0.5               | 188       | 6     |
|         |                    | SEMA6D_2    | GGCTGGCAATCATCAGCTTC  | TTGCATTTGAGCACTGGCAC  | 60      | 0.5               | 178       | 5     |
| TMEM86A | ENSGALG00000006358 | TMEM86A_1   | GGGGAGTCGCGAAGCTTAAT  | GAAACAGGAGCATGCGAAGC  | 60      | 0.5               | 197       | 22    |
| ELAVL1  | ENSGALG00000000726 | ELAVL1_1    | ATACATCAGTGGGCTCCCGA  | AGGTGCAGTGCATCACAGTC  | 60      | 0.5               | 154       | 9     |
|         |                    | ELAVL1_2    | TCTGAAGGAAACGCTCCGAC  | TCTGCCGATGTCATCTCTGC  | 60      | 0.5               | 168       | 7     |
|         |                    | ELAVL1_3    | ACGTGAAGTCAGAAAGGCC   | CCAACCACAAACACGCTCAG  | 60      | 0.5               | 170       | 9     |
| NR3C1   | ENSGALG00000007394 | NR3C1_1     | TGAACAAGTCCTCGAGCCTG  | TCCAGGGTGCTTTGGTCTTC  | 60      | 0.5               | 184       | 16    |
|         |                    | NR3C1_2     | CTCAACAGGTCCCGACACAT  | GAACCGCTCCATCTGACGAC  | 55      | 0.75              | 176       | 30    |
|         |                    | NR3C1_3     | GTTATTGCTGCGTTTCCCC   | GGAACGAGATCAGCTCAGGG  | 60      | 0.5               | 200       | 26    |
|         |                    | NR3C1_4     | TCTGATCGCTCCTGCTCTCT  | TCACTGCGAGGTGATTTGGG  | 60      | 0.5               | 200       | 18    |
| UBC     | ENSGALG00000004509 | UBC_1       | TGTGATGCTGTGGTTACGGG  | GAGAGGGCAGATTTGCGGTGG | 58      | 0.75              | 196       | 9     |
|         |                    | UBC_2       | CTAGCAACAGGGCTGACCTC  | GGATCTGGAGTTGCGGTGAA  | 58      | 0.5               | 183       | 11    |
|         |                    | UBC_3       | TCTCGCTGCAGACGCATAAA  | TCCAACCCTCTCTGTCTCCC  | 60      | 0.5               | 186       | 14    |

For every gene the Ensembl accession number, the sequences, the annealing temperature (Ta, °C) and primer concentration (μM) of the forward and reverse primer pair, the size of the amplified fragment (bp) and the number of CpG in this fragment (# CpG) are provided.

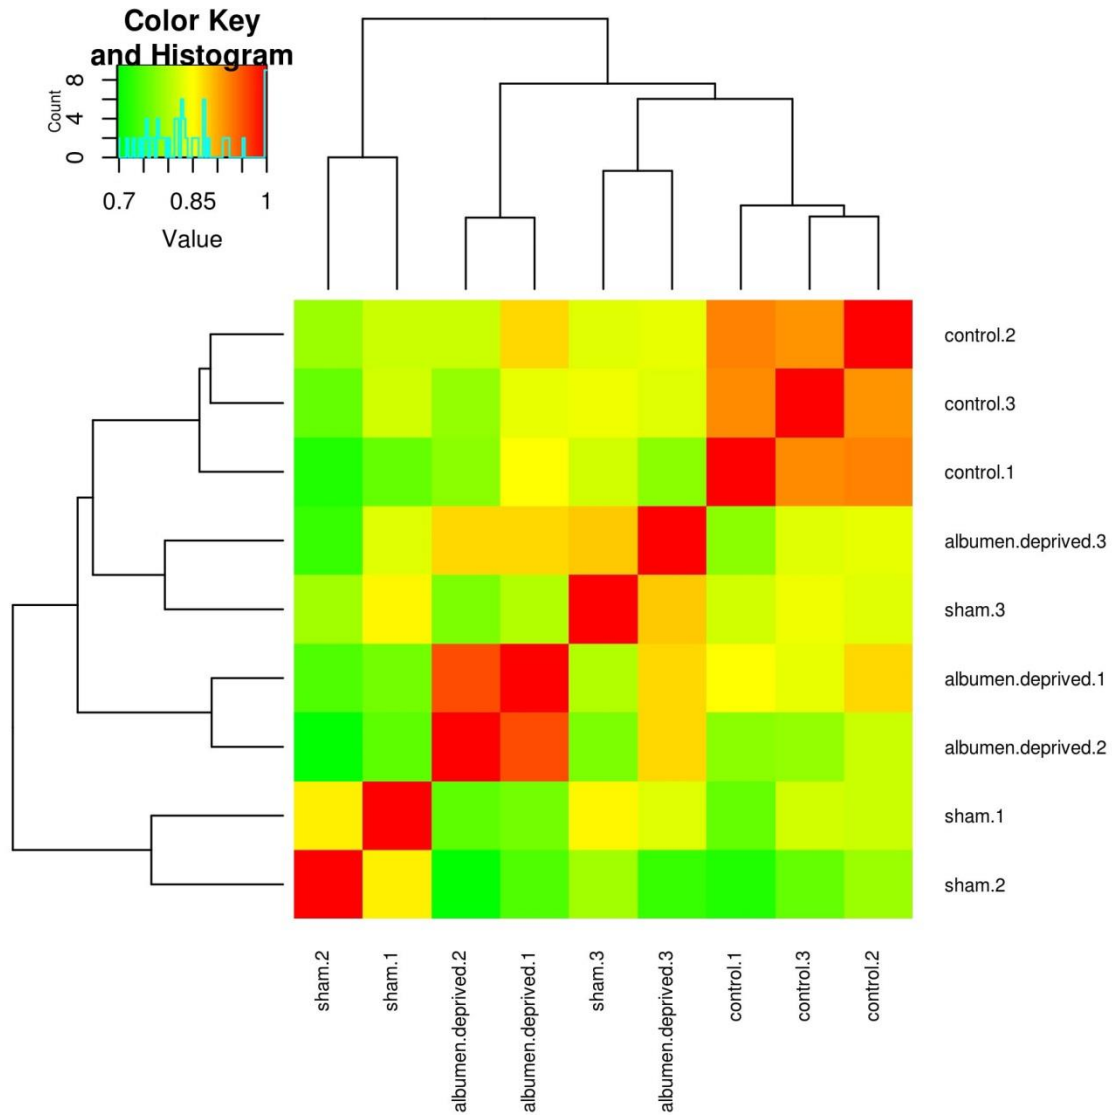

**Supplementary Figure S1:** Correlation between biological replicates based on the 75 differentially expressed genes ( $P < 0.001$  and  $\log_2 FC > 1$ ). Heat-map of Spearman's correlation of the normalized counts as expression levels from all samples compared against each other, represented by a colored field ranging from green (0.95) to red (1).
